# Supplementary material for: Landscape of Research Areas for Zeolites and Metal-Organic Frameworks Using Computational Classification Based on Citation Networks
Source: MDPI journal article supplement (doi:10.3390/ma10121428), 2017-12-14
Supplement: s1 [file s1]

## Supplementary Materials

### **Landscape of Research Areas for Zeolites and Metal-organic Frameworks: Computational Detection of Emerging Research Domains**

Takaya Ogawa<sup>1,\*,\dagger,\S</sup>, Kenta Iyoki<sup>2,\*,\dagger,\S</sup>, Tomohiro Fukushima<sup>1,\*,\S</sup> and Yuya Kajikawa<sup>3</sup>

<sup>1</sup>Department of Chemistry, Massachusetts Institute of Technology, 77 Massachusetts Avenue, Cambridge, MA 02139, USA

<sup>2</sup>Department of Chemical Engineering, Massachusetts Institute of Technology, 77 Massachusetts Avenue, Cambridge, MA 02139, USA

<sup>3</sup>School of Environment and Society, Tokyo Institute of Technology, 3-3-6 Shibaura, Minato-ku, Tokyo 108-0023, Japan; kajikawa@mot.titech.ac.jp

\*Correspondence: takaya@mit.edu or t.o.1221@gmail.com (T.O.);  
k\_iyoki@chemsys.t.u-tokyo.ac.jp or iyoki.kenta@gmail.com (K.I.);  
tfuku@sci.hokudai.ac.jp or f.ky.note@gmail.com (T.F.)

<sup>\dagger</sup>SUNCAT Center for Interface Science and Catalysis, Department of Chemical Engineering Stanford University, 443 Via Ortega, Stanford, CA 94305, USA.

<sup>\S</sup>Department of Chemical System Engineering, The University of Tokyo, 7-3-1 Hongo, Bunkyo-ku, Tokyo 113-8656, Japan.

<sup>\S</sup>Department of Chemistry, Faculty of Science, Hokkaido University, Sapporo, Hokkaido 060-0810, Japan.

\*E-mail:

takaya@mit.edu, t.o.1221@gmail.com (TO),

k\_iyoki@chemsys.t.u-tokyo.ac.jp, iyoki.kenta@gmail.com (KI),

tfuku@sci.hokudai.ac.jp, f.ky.note@gmail.com (TF)

## Table of Contents

| <b>Contents</b>                                                  | <b>Pages</b> |
|------------------------------------------------------------------|--------------|
| Note for high impact journal (HIJ) indexes                       | S3           |
| Journal distribution of publication number for zeolites and MOFs | S4-6         |
| Calculation of synthetic costs for zeolites and MOFs             | S7-S8        |

### Note for high impact journal (HIJ) indexes

In this analysis, we focused on the high impact journal for given cluster. High impact journals are counted and averaged with number of publication whereas low impact journals are neglected in the contribution.

Table S1 shows the effect of simulated impact factor for rest of journals in the report. We varied impact factor from 0 to 4 for the rest of journals but relative tendency between the cluster was found to be similar to each impact factor.

$$\text{High impact journal index of a cluster} = \frac{\sum n_i \times IF_j + (n_{total} - \sum n_i) \times IF_x}{n_{total}}$$

eqn(2)

Table S1. Effect of simulated impact factor for rest of journals

| #         | IFx = 0 | IFx = 2 | IFx = 4 | IFx = 6 | IFx = 8 |
|-----------|---------|---------|---------|---------|---------|
| Zeolite-1 | 0.882   | 2.758   | 4.634   | 6.510   | 8.386   |
| Zeolite-2 | 0.350   | 2.293   | 4.236   | 6.179   | 8.121   |
| Zeolite-3 | 0.699   | 2.584   | 4.470   | 6.356   | 8.241   |
| Zeolite-4 | 0.0488  | 2.041   | 4.033   | 6.025   | 8.017   |
| Zeolite-5 | 0.125   | 2.103   | 4.081   | 6.059   | 8.037   |
| MOF-1     | 0.827   | 2.668   | 4.508   | 6.349   | 8.189   |
| MOF-2     | 2.239   | 3.871   | 5.503   | 7.135   | 8.767   |
| MOF-3     | 2.960   | 4.463   | 5.965   | 7.467   | 8.969   |

Table S2. Journal distribution of publication number for MOFs

|              | A-1  | A-2  | A-3  | B-1  | B-2  | B-3 | C-1 | C-2 | C-3 |
|--------------|------|------|------|------|------|-----|-----|-----|-----|
| Nature       | 1    | 2    | 2    | 5    | 6    | 0   | 1   | 1   | 0   |
| Nature Chem  | 3    | 2    | 2    | 12   | 15   | 4   | 10  | 8   | 0   |
| Nature Mater | 1    | 3    | 3    | 14   | 4    | 2   | 0   | 2   | 0   |
| Nature Comm  | 1    | 4    | 1    | 20   | 22   | 2   | 9   | 5   | 7   |
| Science      | 1    | 1    | 4    | 11   | 13   | 0   | 4   | 2   | 0   |
| PNAS         | 1    | 1    | 2    | 5    | 8    | 0   | 1   | 1   | 2   |
| JACS         | 39   | 104  | 78   | 240  | 225  | 27  | 51  | 70  | 24  |
| Angew        | 31   | 66   | 79   | 154  | 104  | 8   | 43  | 35  | 21  |
| Chem Sci     | 3    | 17   | 6    | 47   | 36   | 4   | 11  | 10  | 7   |
| EES          | 1    | 0    | 1    | 17   | 49   | 7   | 1   | 6   | 6   |
| Adv Mater    | 2    | 9    | 2    | 43   | 24   | 2   | 14  | 7   | 11  |
| Chem Commun  | 87   | 202  | 114  | 327  | 241  | 15  | 66  | 54  | 53  |
| Total        | 4156 | 3509 | 2999 | 4439 | 4398 | 419 | 698 | 694 | 685 |

Table S3-1. Journal distribution of publication number for Zeolites

|                 | A-1   | A-2  | A-3  | A-4 | B-1   | B-2  | B-3  | B-4  |  |
|-----------------|-------|------|------|-----|-------|------|------|------|--|
| Nature          | 56    | 8    | 13   | 1   | 20    | 2    | 7    | 1    |  |
| Nature<br>Chem  | 7     | 3    | 6    | 0   | 1     | 0    | 0    | 0    |  |
| Nature<br>Mater | 15    | 5    | 6    | 1   | 2     | 1    | 0    | 0    |  |
| Nature<br>Comm  | 5     | 4    | 9    | 0   | 3     | 1    | 1    | 0    |  |
| Science         | 26    | 15   | 10   | 2   | 8     | 1    | 2    | 0    |  |
| PNAS            | 10    | 4    | 5    | 0   | 3     | 1    | 0    | 0    |  |
| JACS            | 210   | 103  | 176  | 6   | 324   | 92   | 50   | 6    |  |
| Angew           | 166   | 72   | 117  | 12  | 119   | 27   | 24   | 6    |  |
| Chem<br>Sci     | 9     | 1    | 16   | 2   | 9     | 3    | 2    | 2    |  |
| EES             | 1     | 9    | 37   | 1   | 3     | 1    | 0    | 0    |  |
| Adv<br>Mater    | 13    | 42   | 20   | 10  | 9     | 3    | 1    | 1    |  |
| Chem<br>Commun  | 137   | 70   | 164  | 11  | 171   | 65   | 28   | 6    |  |
| Total           | 13732 | 7000 | 4421 | 632 | 23381 | 6789 | 6466 | 1558 |  |

Table S3-2. Journal distribution of publication number for Zeolites

|                 | C-1  | C-2  | C-3  | C-4  | D    | E    |
|-----------------|------|------|------|------|------|------|
| Nature          | 8    | 6    | 1    | 2    | 0    | 0    |
| Nature<br>Chem  | 3    | 0    | 0    | 0    | 0    | 0    |
| Nature<br>Mater | 3    | 1    | 0    | 0    | 0    | 0    |
| Nature<br>Comm  | 4    | 0    | 0    | 0    | 0    | 0    |
| Science         | 5    | 6    | 0    | 1    | 0    | 1    |
| PNAS            | 4    | 1    | 0    | 3    | 1    | 0    |
| JACS            | 47   | 131  | 2    | 26   | 2    | 4    |
| Angew           | 67   | 42   | 9    | 11   | 0    | 1    |
| Chem<br>Sci     | 4    | 4    | 3    | 0    | 0    | 0    |
| EES             | 6    | 2    | 0    | 0    | 0    | 0    |
| Adv<br>Mater    | 7    | 28   | 1    | 8    | 1    | 0    |
| Chem<br>Commun  | 96   | 85   | 29   | 14   | 1    | 6    |
| Total           | 3548 | 3445 | 2311 | 1517 | 1250 | 1096 |

## Calculation of synthetic costs for zeolites and MOFs

Synthesis of NaY zeolites in 1 kg scale. 200 dollar

| #                        | Aldrich Number | Unit price/dollar | Required amount | Price/dollar |
|--------------------------|----------------|-------------------|-----------------|--------------|
| NaOH pellet              | 221465-50KG    | 1908              | 47.4 g          | 1.8          |
| Sodium aluminate         | 13404-5KG-R    | 237               | 431 g           | 20.4         |
| Sodium silicate solution | 338443-3L      | 167               | 4.7 kg          | 187.8        |

*Batch Preparation (for 32 g anhydrous product)*

*Seed Gel*

(1) [19.95 g water + 4.07 g sodium hydroxide + 2.09 g sodium aluminate], stir in 50 mL plastic bottle until dissolved

(2) [(1) + 22.72 g sodium silicate solution], stir moderately for at least 10 minutes; after stirring, cap the bottle and let the solution age at room temperature for 1 day

*Feedstock Gel*

(3) [130.97 g water + 0.14 g sodium hydroxide + 13.09 g sodium aluminate], stir in a 500 mL plastic beaker until dissolved

(4) [(3) + 142.43 g sodium silicate solution], stir vigorously with a high-shear turbine mixer until the gel appears somewhat smooth; cover the beaker until the addition of the seed gel

*Overall Gel*

(5) [(4) + 16.50 g of (2)], slowly add seed gel (2) to feedstock gel (4) under high shear; move the beaker during mixing to ensure the entire gel volume encounters the high shear from the turbine (up to 20 minutes)

*Crystallization*

*Vessel: 300 mL polypropylene bottle (sealed)*

*Incubation: One day at room temperature*

*Temperature: 100°C*

*Time: After about 5 h, the gel will separate into a solid (containing the NaY Zeolite) that*

will settle to the bottom, and a hazy supernatant liquid. Continue heating until the supernatant is clear indicating complete crystallization (no more than 2 additional hours)

*Verified syntheses of zeolitic materials*, 3<sup>rd</sup> revised edition, S. Mintova ed. ISBN: 978-0-692-68539-6

Synthesis of MOF-5 in 1kg scale. 14k dollar.

| #                                     | Aldrich Number | Unite price/dollar | Required amount | Price/dollar |
|---------------------------------------|----------------|--------------------|-----------------|--------------|
| Zn(OAc) <sub>2</sub> H <sub>2</sub> O | Z0625-1KG      | 77.20              | 3.4kg           | 262.48       |
| Terephthalic acid                     | 185361-500G    | 29.90              | 1kg             | 59.80        |
| Triethylamine                         | T0886-1L       | 100.00             | 1.7litter       | 170.00       |
| DMF                                   | 227056-18L     | 790                | 230litter       | 10094.44     |
| CHCl <sub>3</sub>                     | 650498-4X4L    | 825                | 70 litter       | 3609.375     |

*“Terephthalic acid (5.065 g, 30.5 mmol) and triethylamine (8.5 mL) were dissolved in 400 mL of DMF. Zn(OAc)<sub>2</sub>·2H<sub>2</sub>O (16.99 g, 77.4 mmol) was dissolved in 500 mL of DMF. The zinc salt solution was added to the organic solution with stirring over 15 min, forming a precipitate, and the mixture was stirred for 2.5 h. A sample of the mixture, still damp, was used for PXRD analysis, which showed pure MOF-5 by comparison with the pattern simulated from SXRD data (Fig. 2a).<sup>2</sup> The precipitate was filtered and immersed in DMF (250 mL) overnight. It was then filtered again and immersed in CHCl<sub>3</sub> (350 mL, HPLC grade). The solvent was exchanged 3 times over 7 days: after 2 days, 3 days, and 7 days. The bulk of the solvent was decanted and the product was evacuated overnight to a pressure of 10 mTorr. It was activated at 120 °C and 10 mTorr for 6 h, at which point it was transferred to a glovebox and weighed (4.92 g, 63%).”*

#### Reference

<http://dx.doi.org/10.1016/j.tet.2008.06.036>
